# Supplementary material for: Determination of the Allelic Composition of the sdw1/denso (HvGA20ox2), uzu1 (HvBRI1) and ari-e (HvDep1) Genes in Spring Barley Accessions from the VIR Collection
Source: MDPI journal article supplement (doi:10.3390/plants13030376), 2024-01-27
Supplement: s1 [file s1]

Table S1. Primers used for identifying barley dwarfing alleles

| Gene             | Primer name                                                                                                                                                                                                 | Marker type | Sequence 5'→3'                       | Target mutation | Target allele identification                                                                                                               | Literature source |
|------------------|-------------------------------------------------------------------------------------------------------------------------------------------------------------------------------------------------------------|-------------|--------------------------------------|-----------------|--------------------------------------------------------------------------------------------------------------------------------------------|-------------------|
| <i>HvGA20ox2</i> | Identification of <i>sdw1.c</i> and <i>sdw1.ins</i>                                                                                                                                                         |             |                                      |                 |                                                                                                                                            |                   |
|                  | MC40861P3F                                                                                                                                                                                                  | InDel       | tatggcgtgaccaaaggttc                 | 64 (+GTTA)      | No PCR - <i>sdw1.a</i> or <i>sdw1.e</i><br>247 bp - <i>sdw1.c</i> , 410 bp - <i>sdw1.ins</i>                                               | [4]               |
|                  | MC40861P4R                                                                                                                                                                                                  |             | caccaatccaccacgaaga                  |                 |                                                                                                                                            |                   |
|                  | Program: 94 °C – 3 min 30 sec; 37 cycles (94 °C – 45 sec, 54 °C – 45 sec, 72 °C – 1 min); 72 °C – 7 min                                                                                                     |             |                                      |                 |                                                                                                                                            |                   |
|                  | dCsdw1.c-F                                                                                                                                                                                                  | dCAPS       | cgtgaccaaaggttcctgtcc                | 64 (+GTTA)      | No PCR - <i>sdw1.a</i> or <i>sdw1.e</i><br>HpaII: CCGG <sup>2</sup><br>276 bp – <i>sdw1.ins</i><br>113 bp (site is absent) – <i>sdw1.c</i> | Present study     |
|                  | dCsdw1.c-R                                                                                                                                                                                                  |             | attgctgaggcggccatgttacc <sup>1</sup> |                 |                                                                                                                                            |                   |
|                  | Program: 94 °C – 3 min 30 sec; 37 cycles (94 °C – 45 sec, 61 °C – 45 sec, 72 °C – 30 sec); 72 °C – 7 min                                                                                                    |             |                                      |                 |                                                                                                                                            |                   |
|                  | Identification of <i>sdw1.d</i>                                                                                                                                                                             |             |                                      |                 |                                                                                                                                            |                   |
|                  | Hv20ox2-F                                                                                                                                                                                                   | CAPS        | cgctgattaactgggacaca                 | 1665 G→A        | No PCR - <i>sdw1.a</i> or <i>sdw1.e</i><br>HaeIII: GGCC<br>194 bp (site is absent)                                                         | [6, 24]           |
|                  | Hv20ox2-R                                                                                                                                                                                                   |             | gttcgctcgtaggaagcag                  |                 |                                                                                                                                            |                   |
|                  | Program: 94 °C – 3 min 30 sec; 8 cycles (94 °C – 45 sec, 59 °C with a 0.5 °C stepdown per 1 cycle – 1 min 30 sec, 72 °C – 1 min); 30 cycles (94 °C – 45 sec, 55 °C – 45 sec, 72 °C – 45 sec); 72 °C – 7 min |             |                                      |                 |                                                                                                                                            |                   |
| <i>HvBr11</i>    | Identification of <i>uzu1.a</i>                                                                                                                                                                             |             |                                      |                 |                                                                                                                                            |                   |
|                  | –                                                                                                                                                                                                           | dCAPS       | <u>gaaatggagaccattggcaagatcaagc</u>  | 2612 A→G        | BstHHI: GCGC<br>265 + 29 bp (site is available)                                                                                            | [16]              |
|                  | –                                                                                                                                                                                                           |             | ccttgctccagattctcatcaac              |                 |                                                                                                                                            |                   |
|                  | Program: 94 °C – 3 min 30 sec; 8 cycles (94 °C – 45 sec, 67 °C with a 0.5 °C stepdown per 1 cycle – 1 min 30 sec, 72 °C – 1 min); 30 cycles (94 °C – 45 sec, 63 °C – 45 sec, 72 °C – 45 sec); 72 °C – 7 min |             |                                      |                 |                                                                                                                                            |                   |
| <i>HvDep1</i>    | Identification of <i>ari-e.GP</i>                                                                                                                                                                           |             |                                      |                 |                                                                                                                                            |                   |
|                  | dCari-e.GP-F                                                                                                                                                                                                | dCAPS       | agcagcaccaattctctcgtaa               | 1508 (+A)       | FokI: CATCC<br>154 bp (site is absent)                                                                                                     | Present study     |
|                  | dCari-e.GP-R                                                                                                                                                                                                |             | caagcagaacgtgagactggat               | FokI: CATCC     |                                                                                                                                            |                   |
|                  | Program: 94 °C – 3 min 30 sec; 37 cycles (94 °C – 45 sec, 60 °C – 45 sec, 72 °C – 30 sec); 72 °C – 7 min                                                                                                    |             |                                      |                 |                                                                                                                                            |                   |

<sup>1</sup> Underlined are nucleotides changed in the primers (compared to the original gene sequence) for creating dCAPS markers.

<sup>2</sup> Instead of these restriction enzymes, their isoschisomers HpaII (BsiSI, HapII, MspI), HaeIII (BshFI, BsnI, BspANI, BsuRI), BstHHI (AspLEI, CfoI, Hin6I, HinP1I, HspAI), FokI (BseGI, BstF5I, BtsCI) can be used.

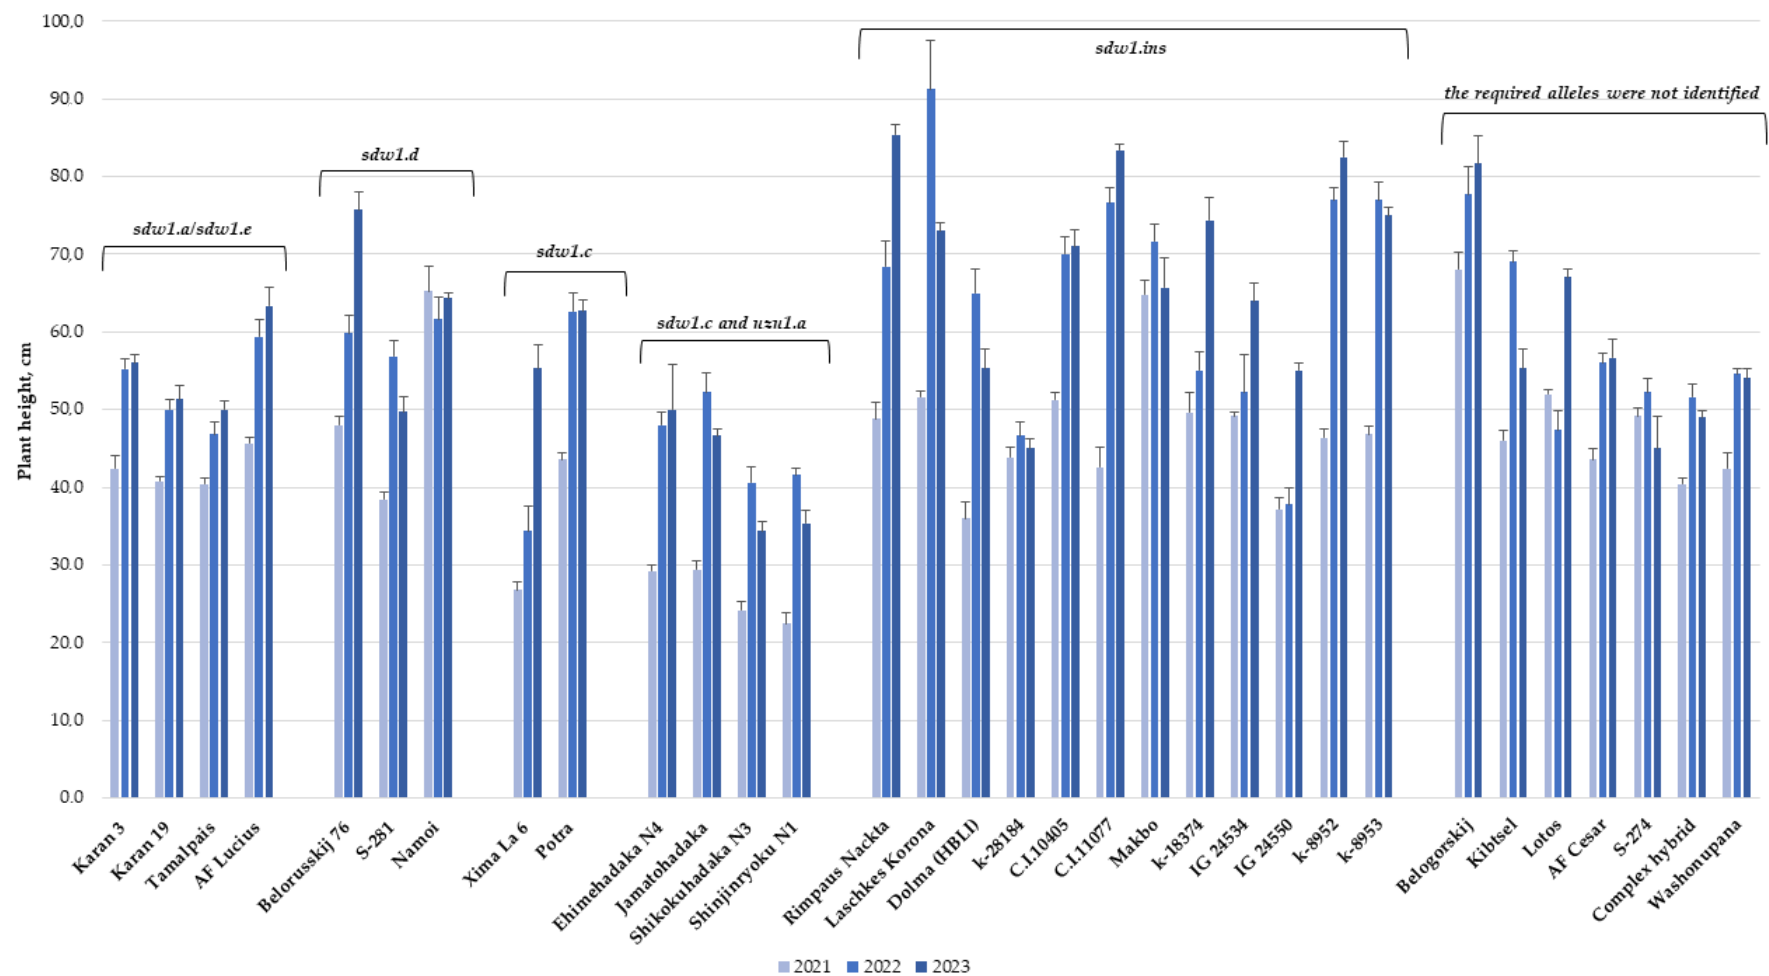

Figure S1. Variation in height of barley accessions in 2021-2023.

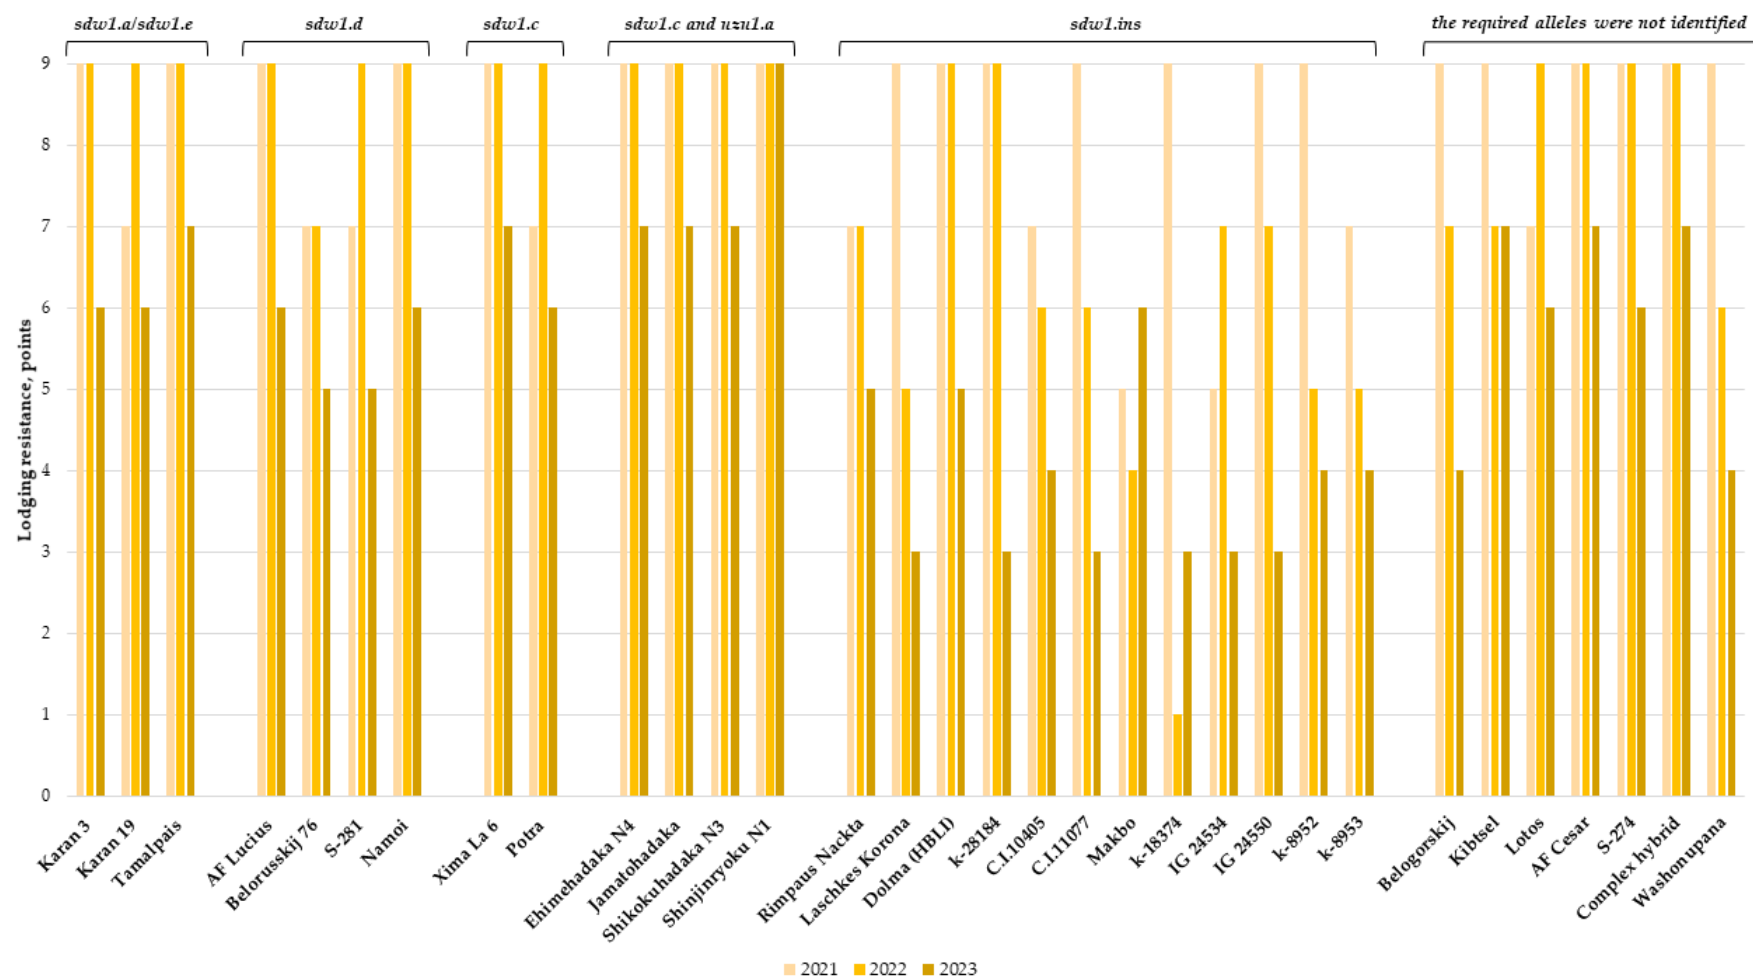

Figure S2. Variation in lodging resistance of barley accessions in 2021-2023 (9 points - high lodging resistance, 5 - average resistance, 1 – lodging).
